# Supplementary material for: BSA-encapsulated cyclometalated iridium complexes as nano-photosensitizers for photodynamic therapy of tumor cells
Source: PubMed Central journal article supplement — RSC Adv. 2021 Apr 23;11(25):15323–31. doi: 10.1039/d1ra01740c (PMC8698255; doi:10.1039/d1ra01740c), 2021-04-23
Supplement: RA-011-D1RA01740C-s001.pdf [file RA-011-D1RA01740C-s001.pdf]

Electronic Supplementary Information

**BSA-encapsulated cyclometalated iridium complexes as nano-photosensitizers for photodynamic therapy of tumor cells**

Yao Xu, Xiang Wang, Kang Song, Jun Du, Jinliang Liu, Yuqing Miao, Yuhao Li\*

Institute of Bismuth Science, College of Science, University of Shanghai for Science and Technology, Shanghai 200093, China.

\* Corresponding authors:

Yuhao Li ([yhli@usst.edu.cn](mailto:yhli@usst.edu.cn))

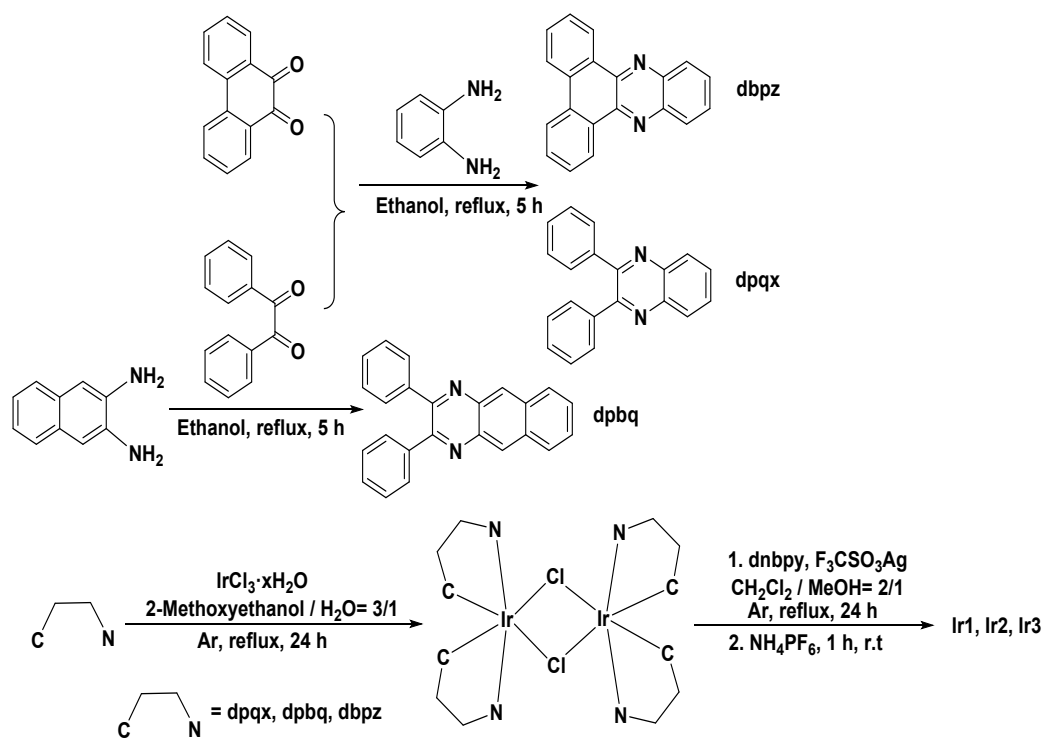

**Fig. S1.** Synthetic route of Ir1, Ir2, and Ir3.

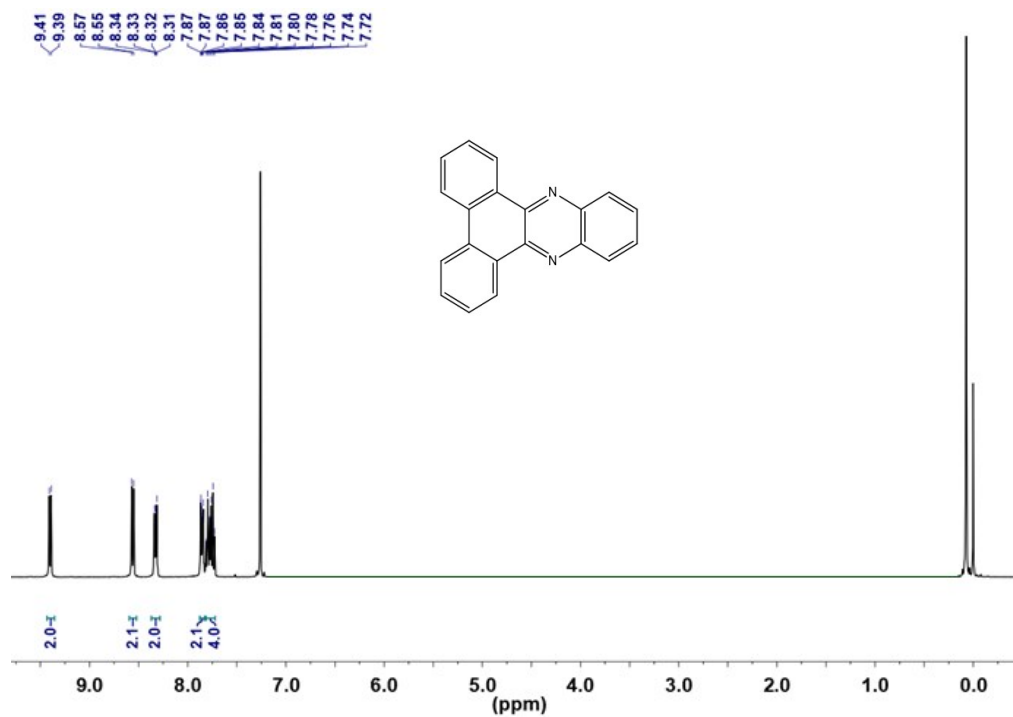

**Fig. S2.**  $^1\text{H-NMR}$  of dbpz.

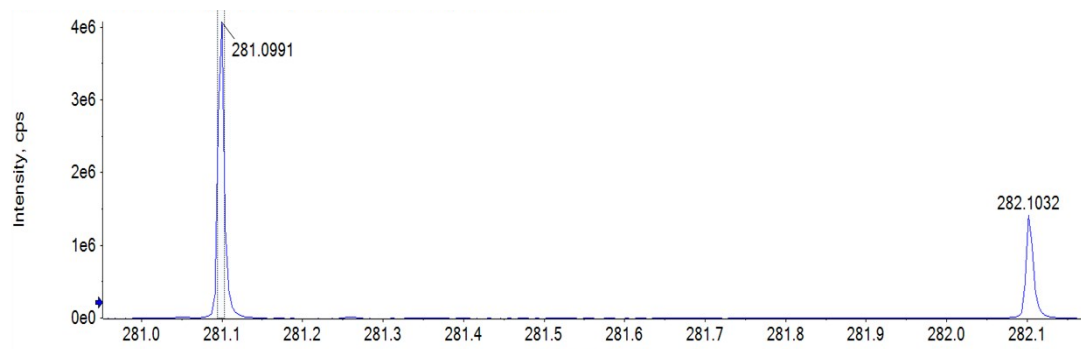

**Fig. S3.** HR-MS of dbpz.

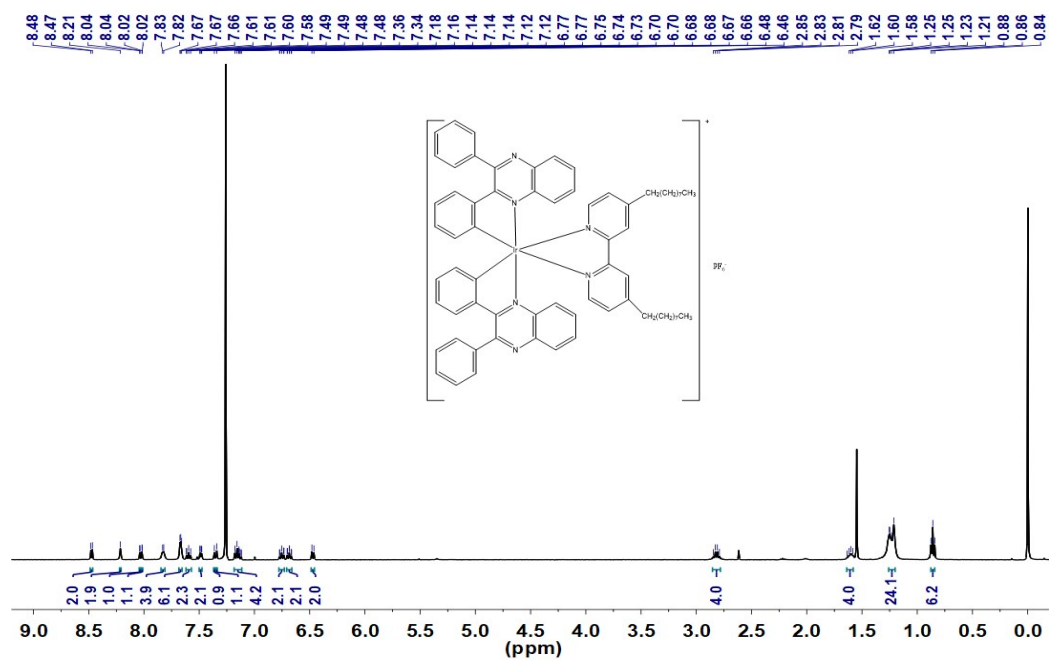

**Fig. S4.** <sup>1</sup>H-NMR of Ir1.

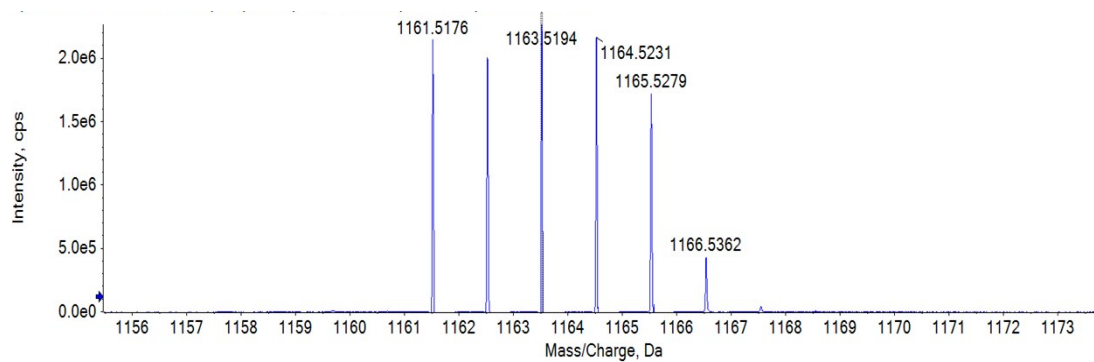

**Fig. S5.** HR-MS of Ir1.

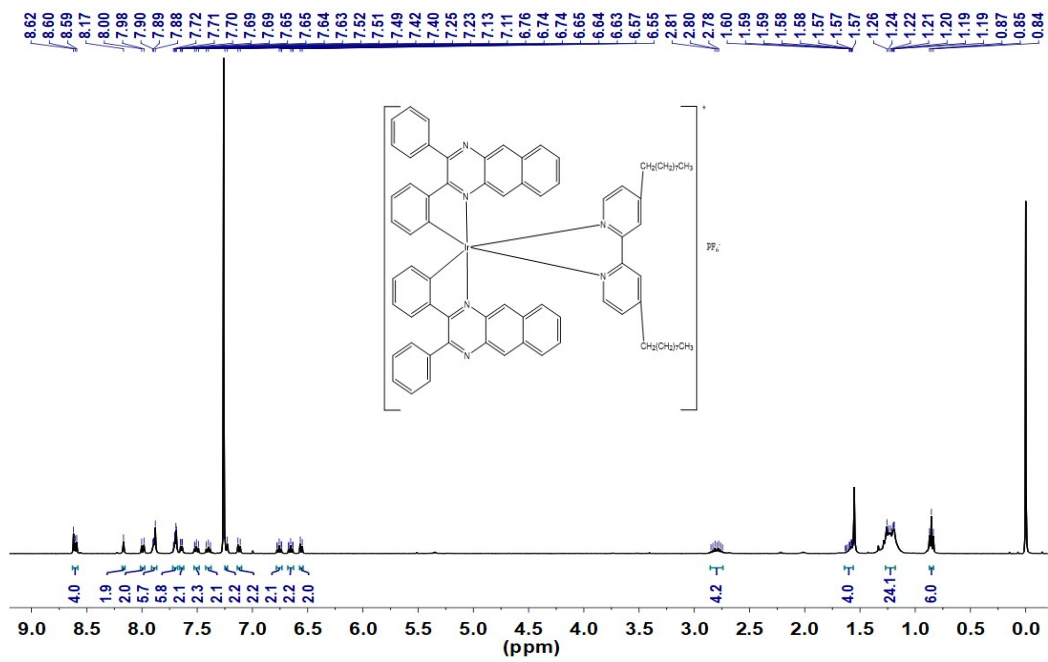

Fig. S6. <sup>1</sup>H-NMR of Ir2.

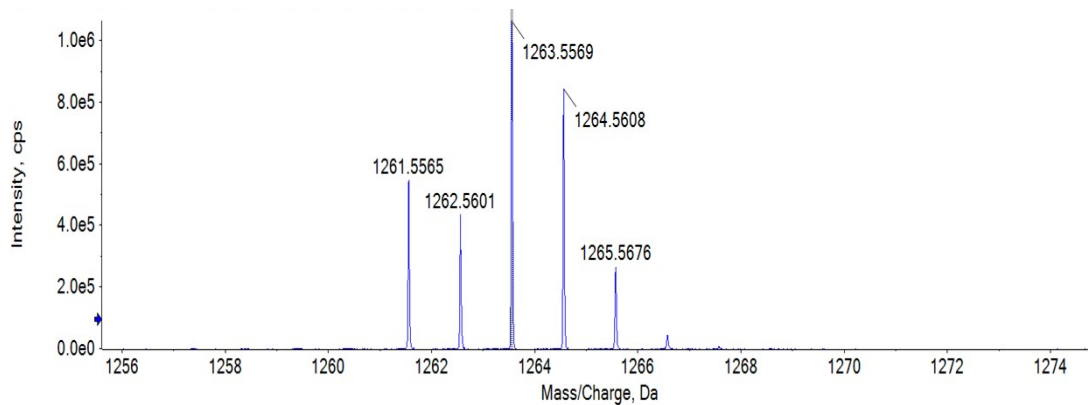

Fig. S7. HR-MS of Ir2.

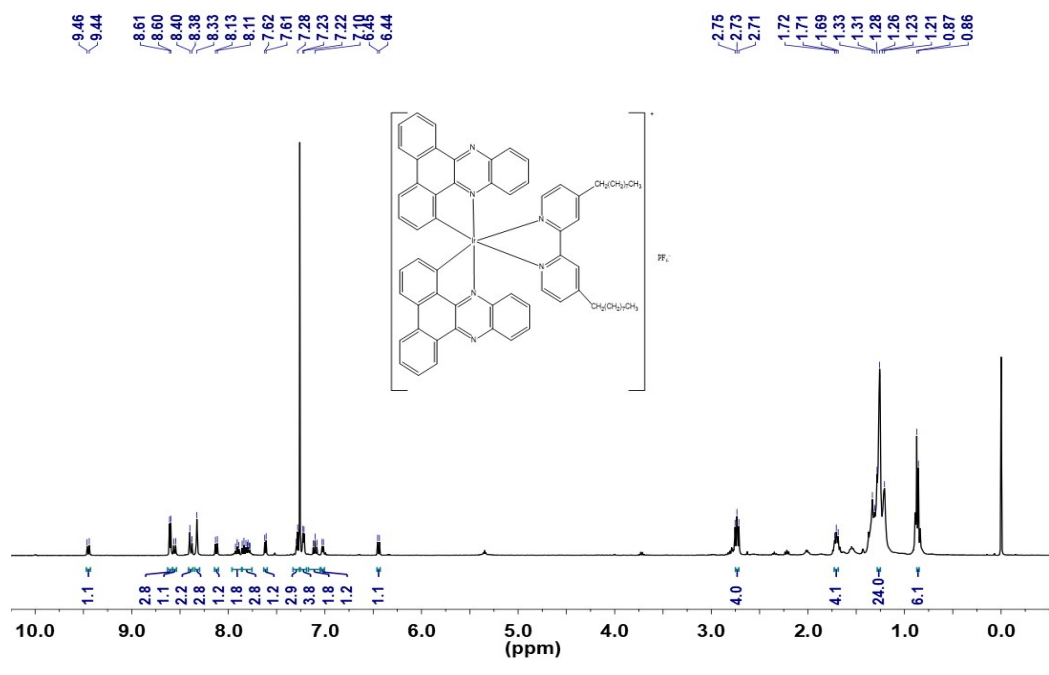

Fig. S8. <sup>1</sup>H-NMR of Ir3.

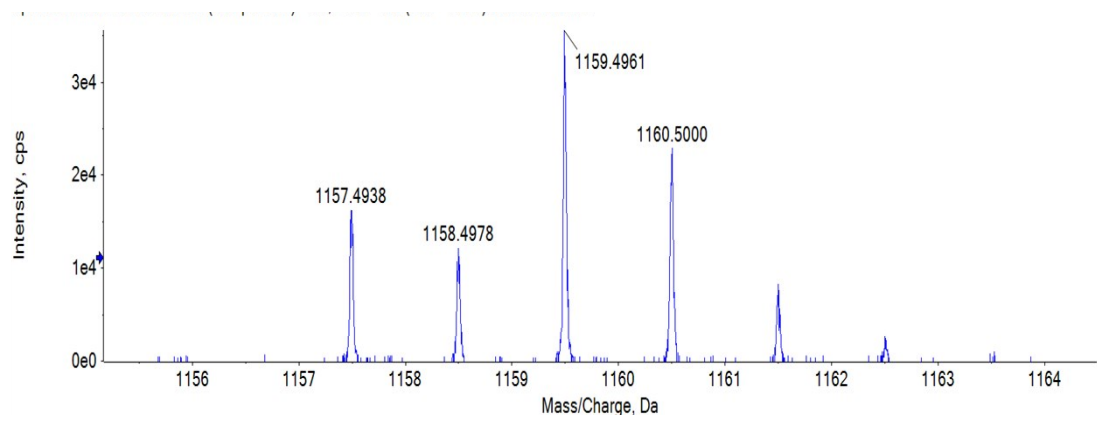

Fig. S9. HR-MS of Ir3.

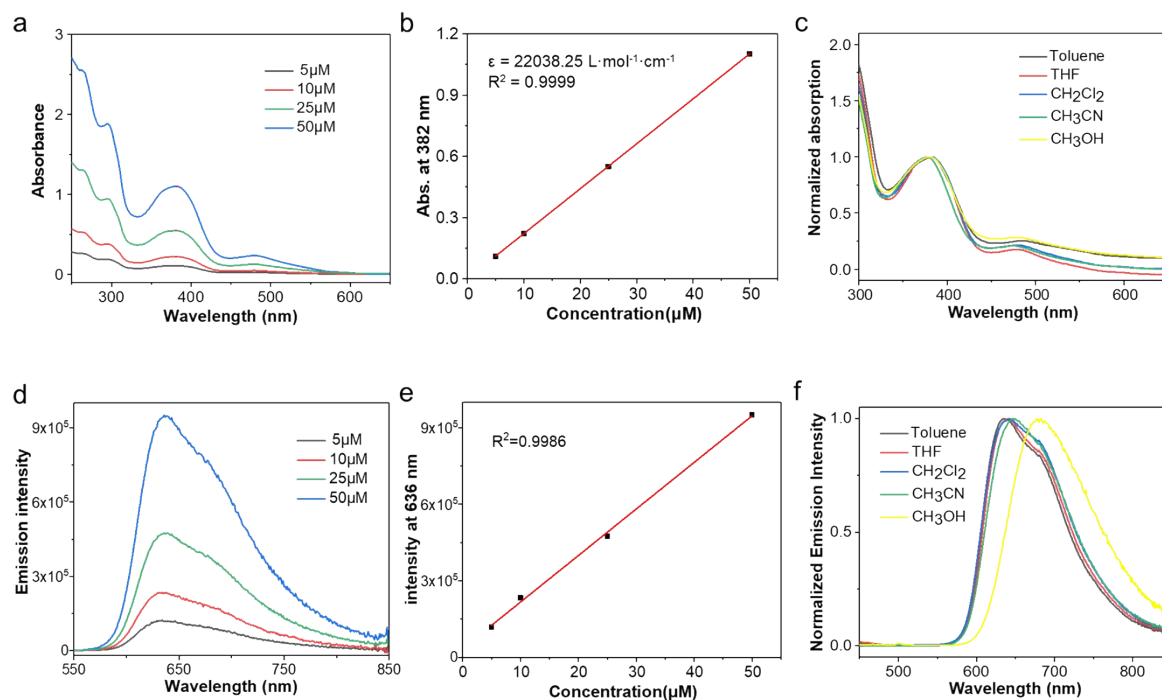

**Fig. S10.** (a) Absorption spectra of Ir1 in  $\text{CH}_2\text{Cl}_2$  at various concentration, (b) absorbance linear fitting of Ir1 at 382 nm in  $\text{CH}_2\text{Cl}_2$  at different concentrations, (c) normalized absorption spectra of Ir1 in different solvents, (d) emission intensity of Ir1 in  $\text{CH}_2\text{Cl}_2$  at various concentration, (e) intensity-concentration linear fitting at 636 nm, (f) normalized emission intensity of Ir1 in different solvents ( $\lambda_{\text{ex}} = 436 \text{ nm}$ ).

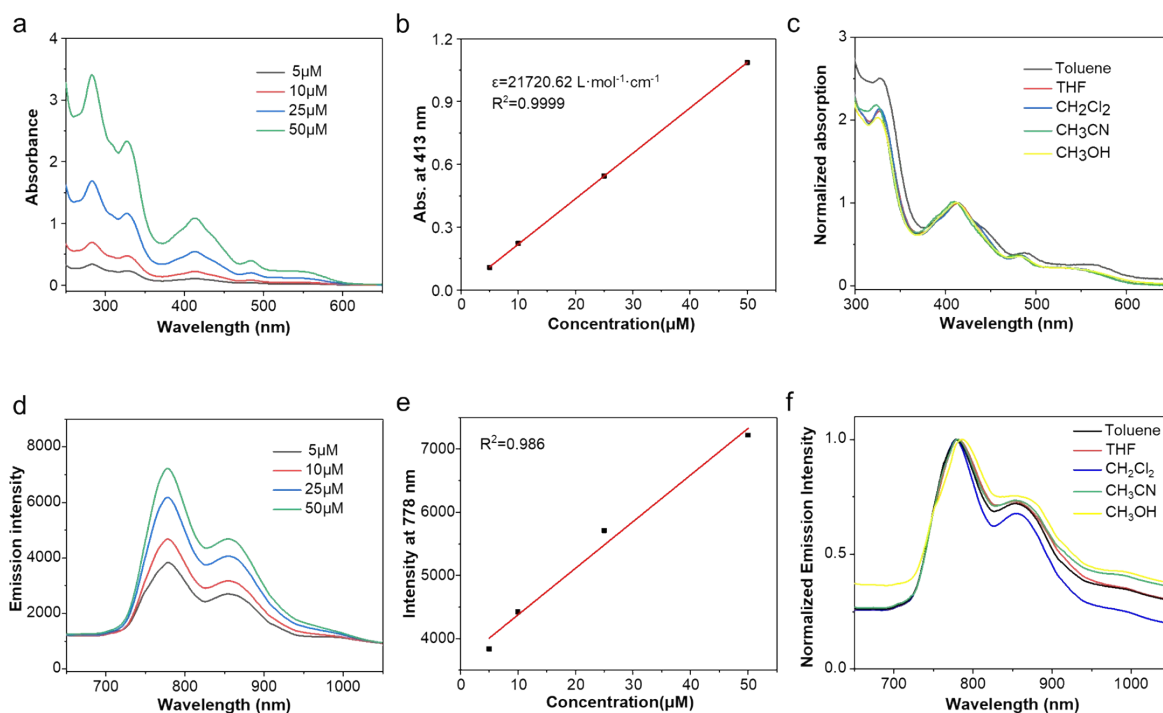

**Fig. S11.** (a) Absorption spectra of Ir2 in  $\text{CH}_2\text{Cl}_2$  at various concentration, (b) absorbance linear fitting of Ir1 at 413 nm in  $\text{CH}_2\text{Cl}_2$  at different concentrations, (c) normalized absorption spectra of Ir2 in different solvents, (d) emission intensity of Ir2 in  $\text{CH}_2\text{Cl}_2$  at various concentration, (e) intensity-concentration linear fitting at 778 nm, (f) normalized emission intensity of Ir2 in different solvents ( $\lambda_{\text{ex}} = 532 \text{ nm}$ ).

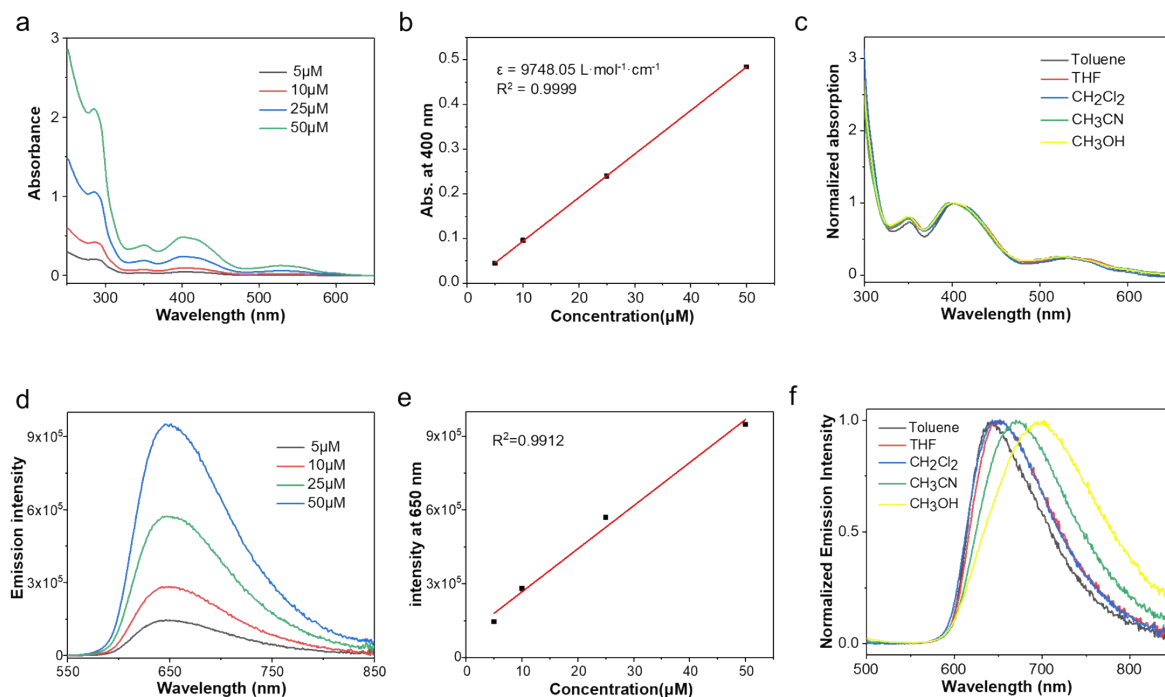

**Fig. S12.** (a) Absorption spectra of Ir3 in  $\text{CH}_2\text{Cl}_2$  at various concentration, (b) absorbance linear fitting of Ir3 at 400 nm in  $\text{CH}_2\text{Cl}_2$  at different concentrations, (c) normalized absorption spectra of Ir3 in different solvents, (d) emission intensity of Ir3 in  $\text{CH}_2\text{Cl}_2$  at various concentration, (e) intensity-concentration linear fitting at 650 nm, (f) normalized emission intensity of Ir3 in different solvents ( $\lambda_{\text{ex}} = 436 \text{ nm}$ ).

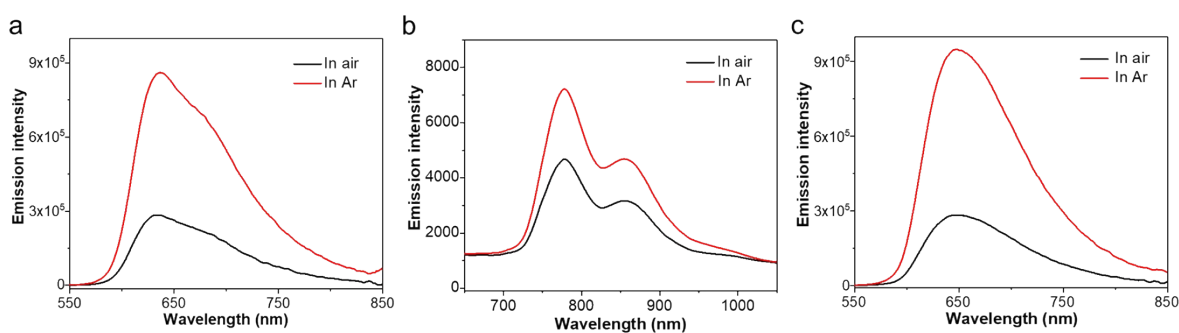

**Fig. S13.** Emission intensity of (a) Ir1 ( $\lambda_{\text{ex}} = 436 \text{ nm}$ ), (b) Ir2 ( $\lambda_{\text{ex}} = 532 \text{ nm}$ ) and (c) Ir3 ( $\lambda_{\text{ex}} = 436 \text{ nm}$ ) in  $\text{CH}_2\text{Cl}_2$  under air or Argon (Ar) atmosphere.



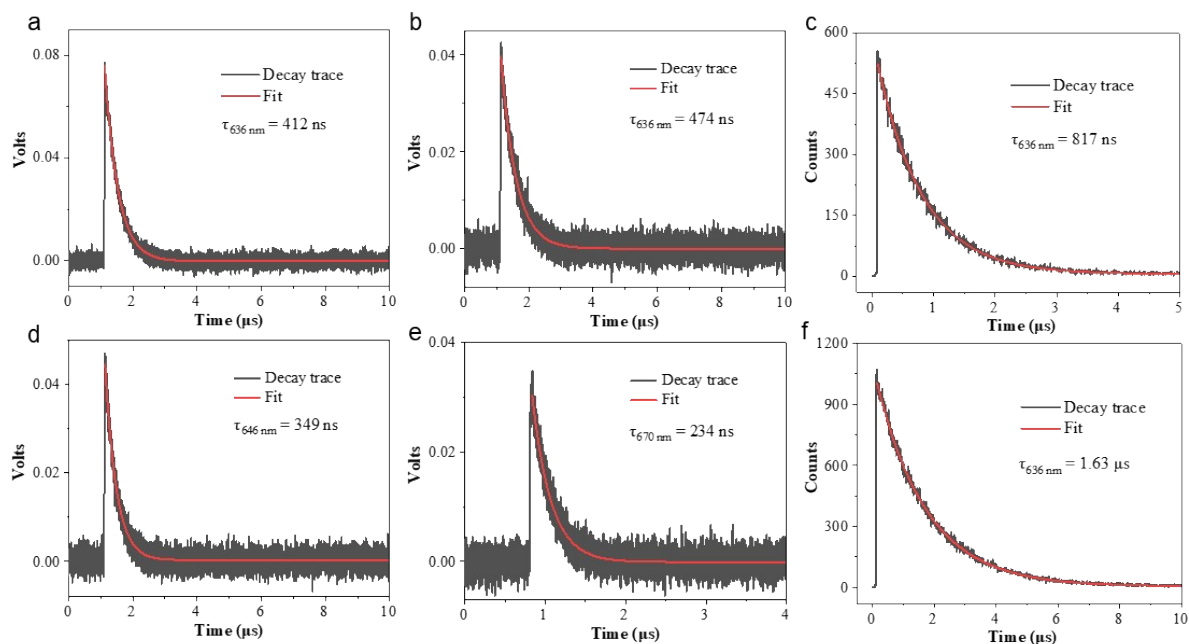

**Fig. S14.** Emission lifetime of Ir1 (a) at 636 nm in toluene, (b) at 636 nm in THF, (c) at 636 nm in  $\text{CH}_2\text{Cl}_2$ , (d) at 646 nm in  $\text{CH}_3\text{CN}$ , (e) at 670 nm in  $\text{CH}_3\text{OH}$ , (f) at 636 nm in degassed  $\text{CH}_2\text{Cl}_2$  ( $\lambda_{\text{ex}} = 355$  nm).

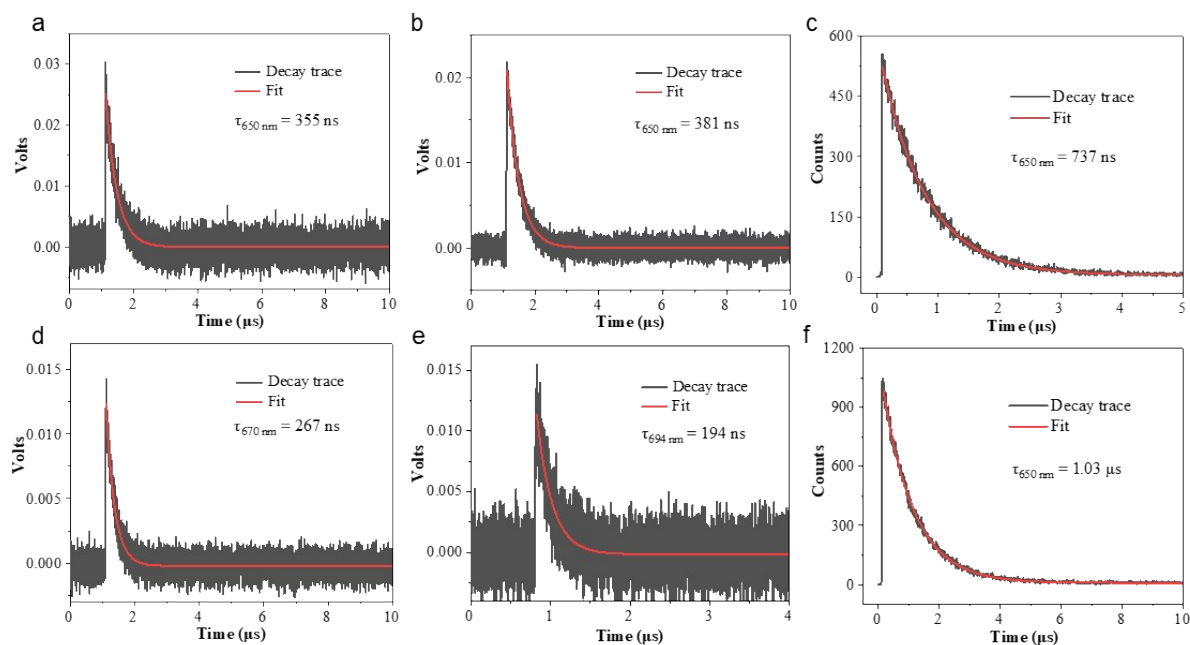

**Fig. S15.** Emission lifetime of Ir3 (a) at 650 nm in toluene, (b) at 650 nm in THF, (c) at 650 nm in  $\text{CH}_2\text{Cl}_2$ , (d) at 670 nm in  $\text{CH}_3\text{CN}$ , (e) at 694 nm in  $\text{CH}_3\text{OH}$ , (f) at 650 nm in degassed  $\text{CH}_2\text{Cl}_2$  ( $\lambda_{\text{ex}} = 355$  nm).

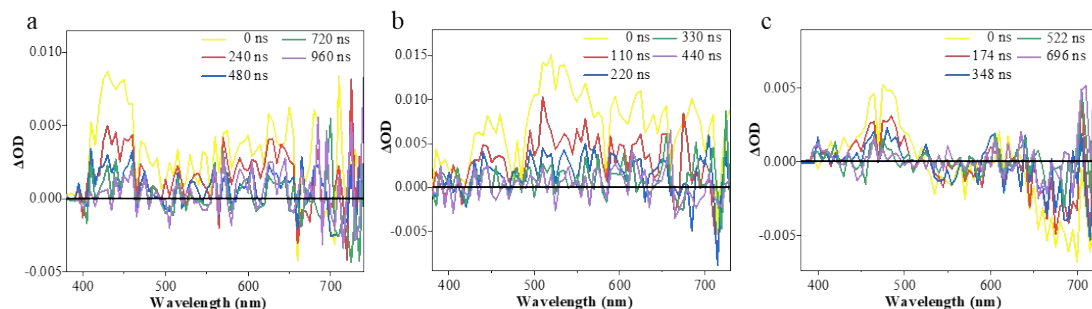

**Fig. S16.** Transient absorption spectra of (a) Ir1, (b) Ir2 and (c) Ir3 in deaerated CH<sub>3</sub>CN,  $\lambda_{\text{ex}} = 355 \text{ nm}$ .

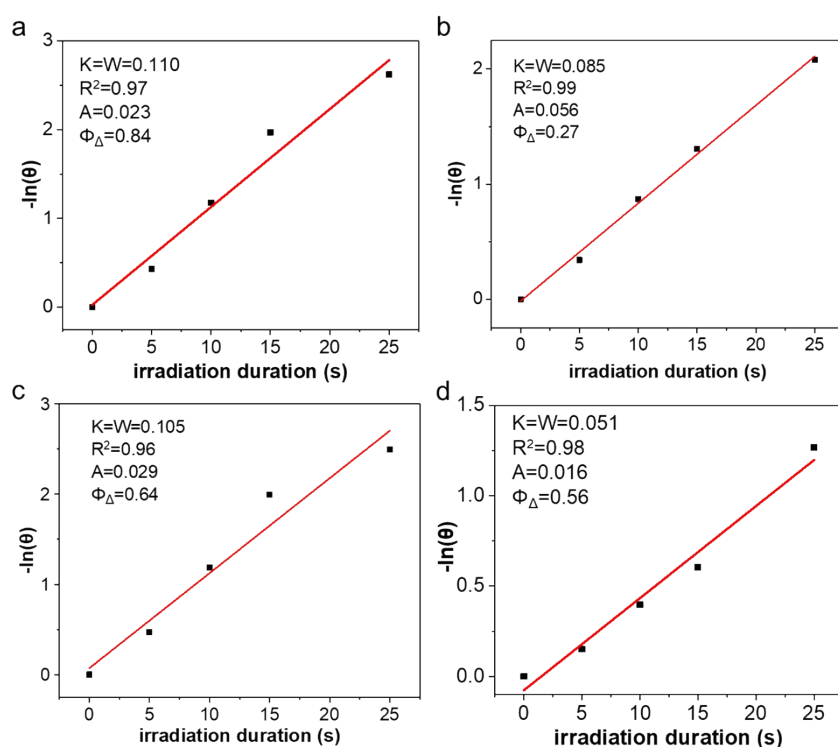

**Fig. S17.** The negative logarithm of the normalized absorbance changes at 410 nm with the irradiation time and the corresponding fitting line, (a) Ir1 + DPBF, (b) Ir2 + DPBF, (c) Ir3 + DPBF, and (d) [Ru(bpy)<sub>3</sub>]Cl<sub>2</sub> + DPBF under 532 nm light irradiation (50 mW cm<sup>-2</sup>).

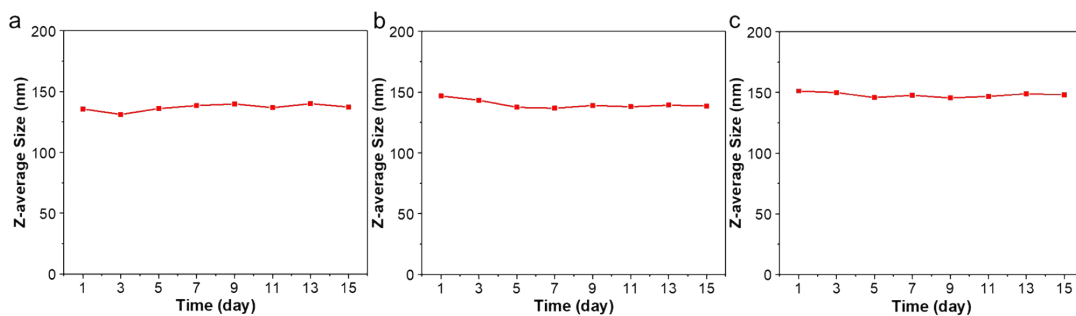

**Fig. S18.** Time-dependent hydrate particle size of (a) Ir1@BSA, (b) Ir2@BSA, and (c) Ir3@BSA for 15 days.

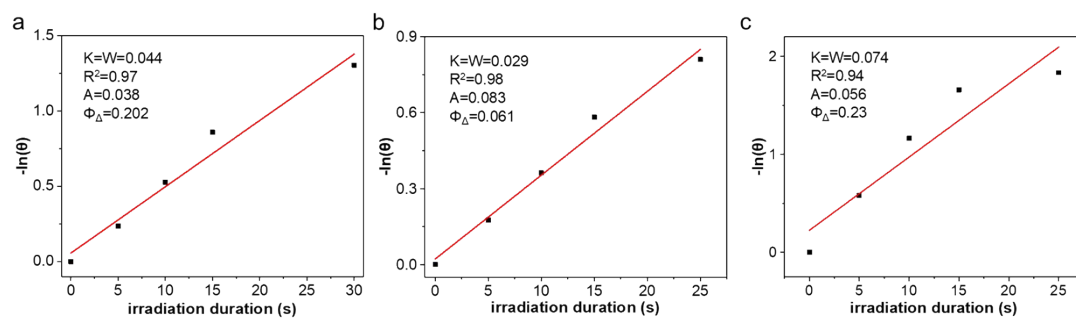

**Fig. S19.** The negative logarithm of the normalized absorbance changes at 415 nm with the irradiation time and the corresponding fitting line, (a) Ir1@BSA + DPBF, (b) Ir2@BSA + DPBF, and (c) Ir3@BSA + DPBF under 532 nm light irradiation ( $50 \text{ mW cm}^{-2}$ ).

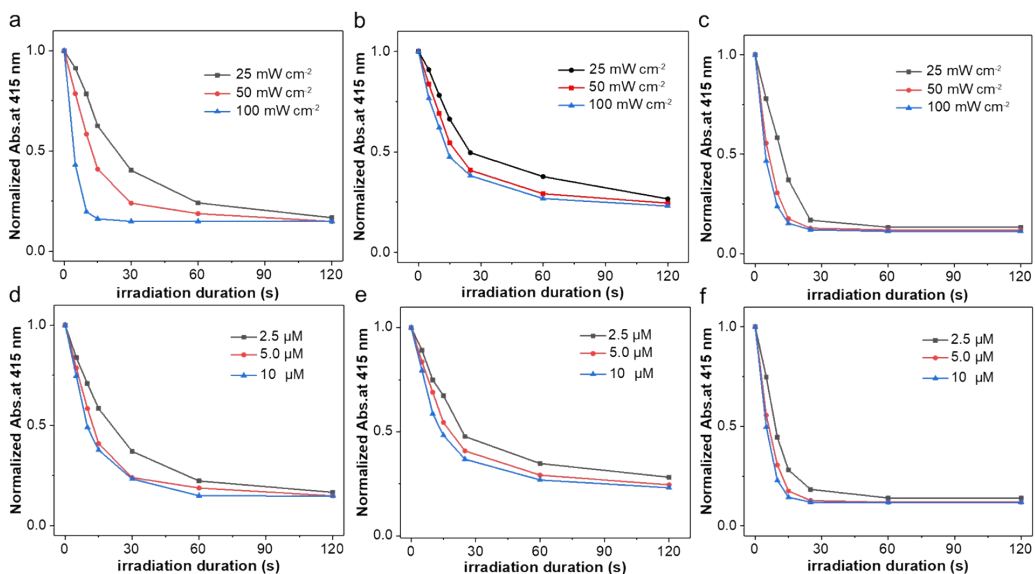

**Fig. S20.** Time-dependent absorbance plot at 415 nm of (a) Ir1@BSA + DPBF, (b) Ir2@BSA + DPBF, and (c) Ir3@BSA + DPBF under various laser power density or under various concentration of (d) Ir1@BSA, (e) Ir2@BSA, and (f) Ir3@BSA.

**Table S1.** Emission quantum yield ( $\Phi_{em}$ ) of Ir1 and Ir3 in different solvents calculated by the integrating sphere method ( $\lambda_{ex} = 532$  nm)

| Solvents | Toluene | THF   | CH <sub>2</sub> Cl <sub>2</sub> | Degassed<br>CH <sub>2</sub> Cl <sub>2</sub> | CH <sub>3</sub> CN | CH <sub>3</sub> OH |
|----------|---------|-------|---------------------------------|---------------------------------------------|--------------------|--------------------|
| Ir1      | 0.146   | 0.179 | 0.176                           | 0.336                                       | 0.081              | 0.054              |
| Ir3      | 0.078   | 0.081 | 0.182                           | 0.474                                       | 0.075              | 0.011              |
